# Supplementary material for: Construction of a CXC Chemokine‐Based Prediction Model for the Prognosis of Colon Cancer
Source: Hindawi journal article supplement (doi:10.1155/2020/6107865), 2020-01-01
Supplement: f1 [file 6107865.f1.pdf]

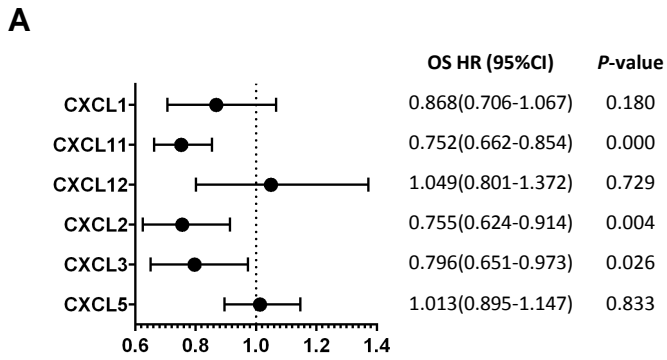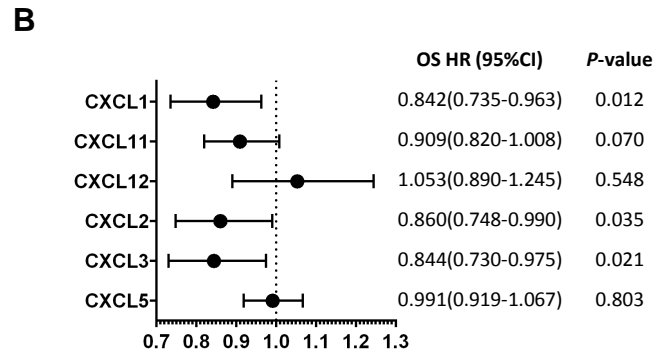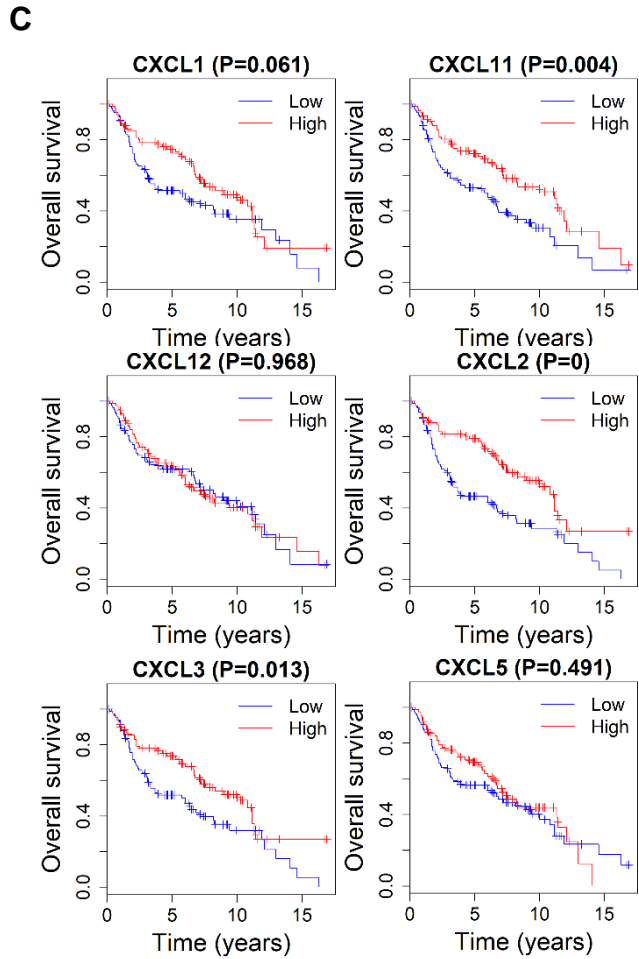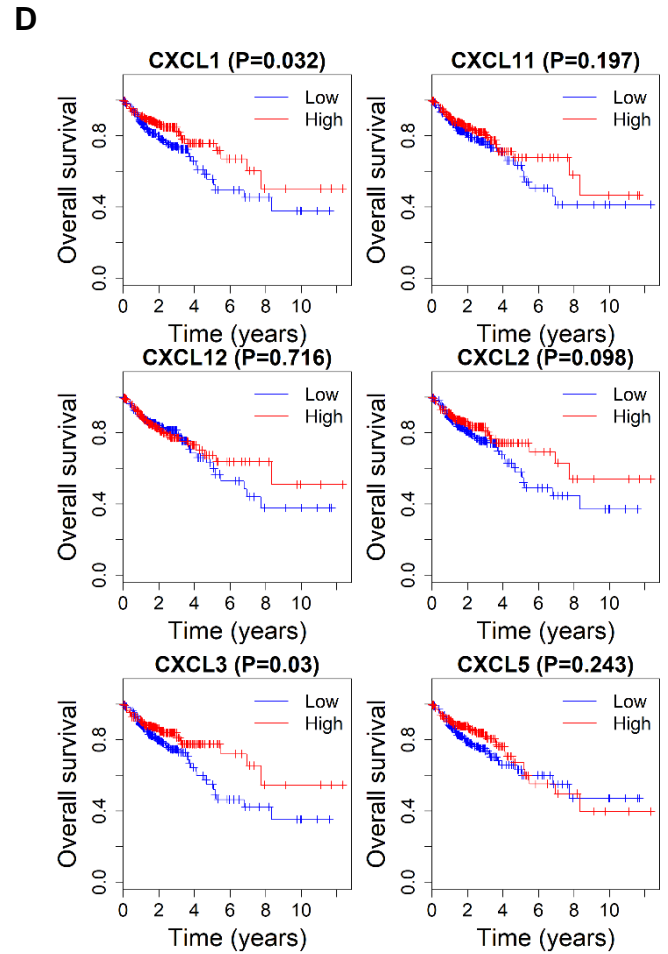

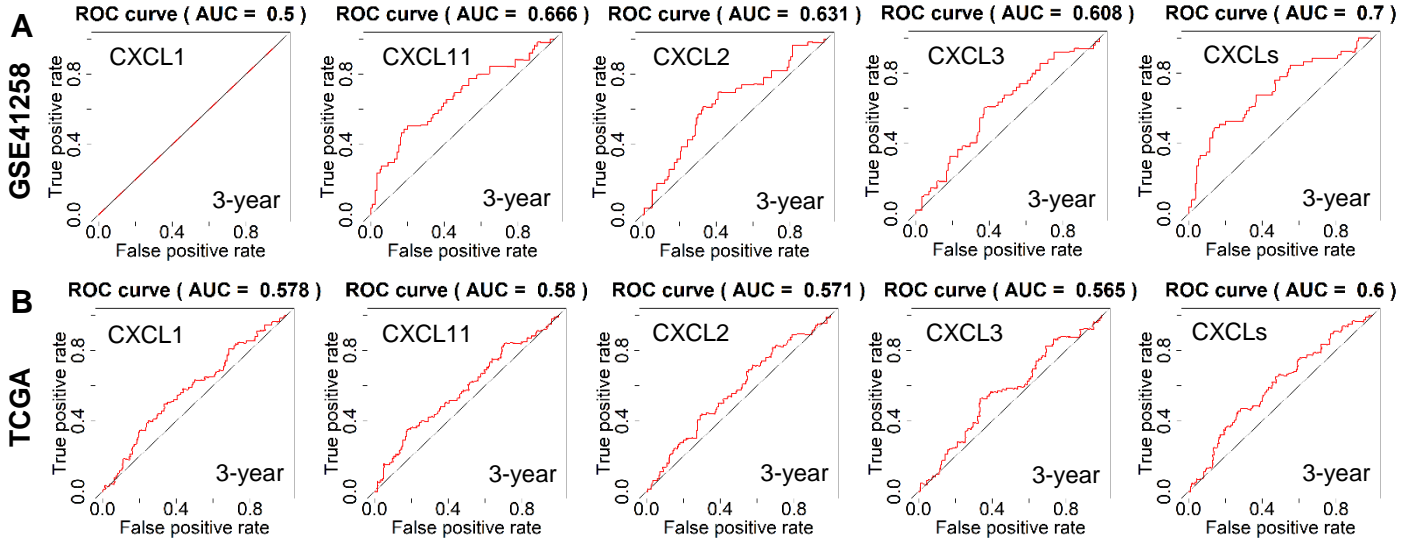

Figure S2
